# Supplementary material for: The photochromic and self-assembling properties of diarylethenes having chiral amphiphilic chains at the reactive carbon atoms
Source: Royal Society of Chemistry journal article supplement (doi:10.1039/b822880a), 2009-01-01
Supplement: b822880a.pdf [file b822880a.pdf]

*Supplementary Information for*

**Photochromic and self-assembling properties of diarylethenes having chiral  
amphiphilic side chains at the reactive carbon atoms**

Takashi Hirose,<sup>1,2</sup> Masahiro Irie<sup>3</sup> and Kenji Matsuda<sup>\*1,2</sup>

<sup>1</sup> *Department of Synthetic Chemistry and Biological Chemistry, Graduate School of Engineering,  
Kyoto University, JST, CREST, Katsura, Nishikyo-ku, Kyoto 615-8510, Japan*

<sup>2</sup> *Department of Chemistry and Biochemistry, Graduate School of Engineering, Kyushu University,  
744 Motoooka, Nishi-ku, Fukuoka 819-0395, Japan*

<sup>3</sup> *Department of Chemistry and Research Center for Smart Molecules, Rikkyo University, 3-34-1  
Nishi-Ikebukuro, Toshima-ku, Tokyo 171-8501, Japan*

kmatsuda@sbchem.kyoto-u.ac.jp

## Experimental Section.

### A. Materials.

All reactions were monitored by thin-layer chromatography carried out on 0.2 mm Merck silica gel plates (60F-254). Column chromatography was performed on silica gel (Kanto Chemical, 63-210 mesh).  $^1\text{H-NMR}$  spectra were recorded on a Bruker AVANCE 400 instrument. Samples were dissolved in  $\text{CDCl}_3$  and tetramethylsilane was used as an internal standard. Mass spectra were obtained by a JEOL JMS-HX110A, a JMS-SX102A, and a BRUKER autoflex-KK MALDI TOF mass spectrometer. 2-(3-Bromo-5-phenyl-thiophen-2-yl)-[1,3]dioxolane (**3**)<sup>1</sup> and tosylated derivative of poly(ethylene glycol) monomethyl ether (**6**)<sup>2</sup> were prepared according to the method reported previously. *p*-toluene sulfonic acid monohydrate and pyridinium-*p*-toluene sulfonate were purchased from TCI.

### Scheme S1. Synthesis of compound **2a**.

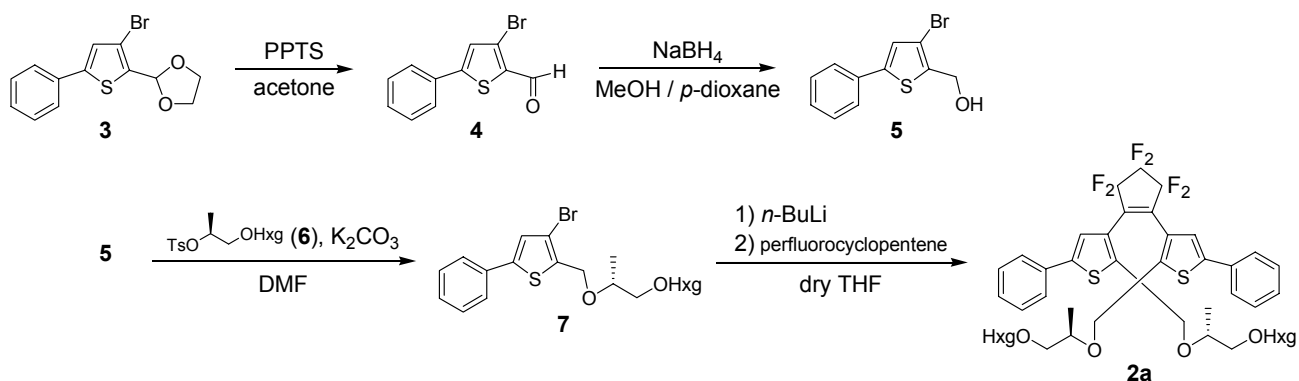

### 3-Bromo-5-phenyl-thiophene-2-carbaldehyde (4)

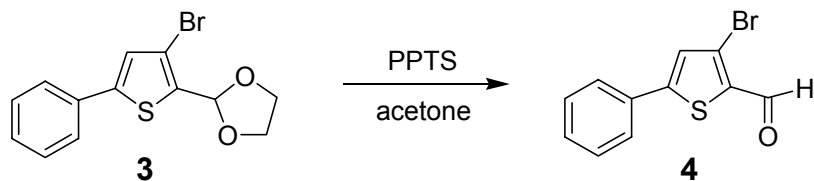

To a solution of 2-(3-bromo-5-phenylthiophen-2-yl)-[1,3]dioxolane (**3**)<sup>1</sup> (1.46 g, 4.69 mmol) in acetone (50 mL) was added pyridinium-*p*-toluene sulfonate (PPTS, 2.30 g, 9.15 mmol). The solution was stirred for 4 h at room temperature. The reaction product was extracted with diethyl ether (× 3), and the organic layer was washed with brine (× 2), dried over MgSO<sub>4</sub>, filtrated, and evaporated. The crude product was purified by recrystallization to yield **4** (685 mg, 2.56 mmol, 54.6%) as a yellow solid.

<sup>1</sup>H-NMR (CDCl<sub>3</sub>, TMS, 400 MHz) δ 7.35 (s, 1 H), 7.41-7.52 (m, 3 H), 7.61-7.67 (m, 2 H), 9.95 (s, 1 H); EI HRMS (*m/z*) [M]<sup>+</sup> calcd for C<sub>11</sub>H<sub>7</sub>BrOS<sup>+</sup>: 265.9395, found: 265.9398.

### (3-Bromo-5-phenyl-thiophen-2-yl)-methanol (5)

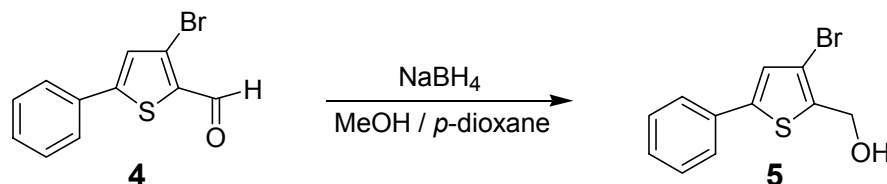

To a solution of 3-bromo-5-phenylthiophene-2-carbaldehyde (**4**) (685 mg, 2.56 mmol) in methanol (15 mL) and *p*-dioxane (15 mL) was added NaBH<sub>4</sub> (1.92 g, 50.8 mmol) at 0 °C. The solution was stirred for 1 h. The reaction product was pored into aqueous dilute sulfuric acid and extracted with diethyl ether (× 3). The organic layer was washed with brine (× 2), dried over MgSO<sub>4</sub>, filtrated, and evaporated to yield **5** (660 mg, 2.45 mmol, 95.7%) as a white powder.

<sup>1</sup>H-NMR (CDCl<sub>3</sub>, TMS, 400 MHz) δ 1.94 (bs, 1 H), 4.81 (s, 2 H), 7.16 (s, 1 H), 7.27-7.44 (m, 3 H), 7.51-7.58 (m, 2 H); EI HRMS (*m/z*) [M]<sup>+</sup> calcd for C<sub>11</sub>H<sub>9</sub>BrOS<sup>+</sup>: 267.9552, found: 267.9556.

### (*R*)-3-Bromo-2-(2-{2-[2-(2-{2-[2-(2-methoxy-ethoxy)-ethoxy]-ethoxy}-ethoxy)-ethoxy]-ethoxy}-1-methyl-ethoxymethyl)-5-phenyl-thiophene (7)

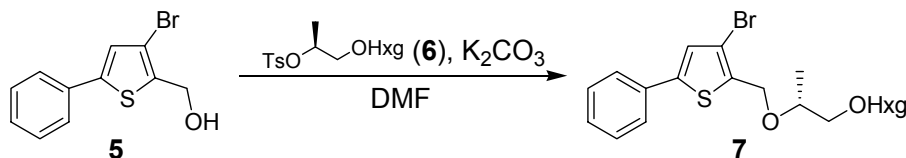

To a solution of NaH (60% in mineral oil, 35.6 mg, 0.89 mmol) in DMF (4 mL), was added (3-bromo-5-phenylthiophen-2-yl)-methanol (**5**) (200 mg, 0.74 mmol) at 0 °C under argon atmosphere. The solution was stirred for about 10 minutes. After the addition of (*S*)-toluene-4-sulfonic acid 2-{2-[2-(2-{2-[2-(2-methoxy-ethoxy)-ethoxy]-ethoxy}-ethoxy)-ethoxy]-ethoxy}-1-methyl-ethyl ester (**6**)<sup>2</sup> (376 mg, 0.74 mmol), the solution was refluxed for 12 h. The reaction was quenched by the addition of water. The reaction product was extracted with ether (×

3), and the organic layer was washed with brine ( $\times 2$ ), dried over  $\text{MgSO}_4$ , filtrated, and evaporated. The crude product was purified by silica gel column chromatography (ethyl acetate) to yield **7** (122 mg, 0.20 mmol, 27.0%) as a yellow oil.

$^1\text{H NMR}$  ( $\text{CDCl}_3$ , TMS, 400 MHz)  $\delta$  1.22 (d,  $J = 6$  Hz, 3 H), 3.38 (s, 3 H), 3.46-3.90 (m, 24 H), 4.32-4.44 (m, 1 H), 4.75 (s, 2 H), 7.13 (s, 1 H), 7.28-7.34 (m, 1 H), 7.35-7.42 (m, 2 H), 7.51-7.57 (m, 2 H); FAB HRMS ( $m/z$ )  $[\text{M} + \text{H}]^+$  calcd for  $\text{C}_{27}\text{H}_{42}\text{BrO}_8\text{S}^+$ : 605.1778, found: 605.1765.

**(*R,R*)-1,2-Bis-[2-{2-(2-[2-{2-(2-[2-methoxy-ethoxy]-ethoxy)-ethoxy]-ethoxy)-ethoxy}-ethoxy)-1-methyl-ethoxymethyl]-5-phenyl-thiophene-3-yl]-perfluorocyclopentene (**2a**)**

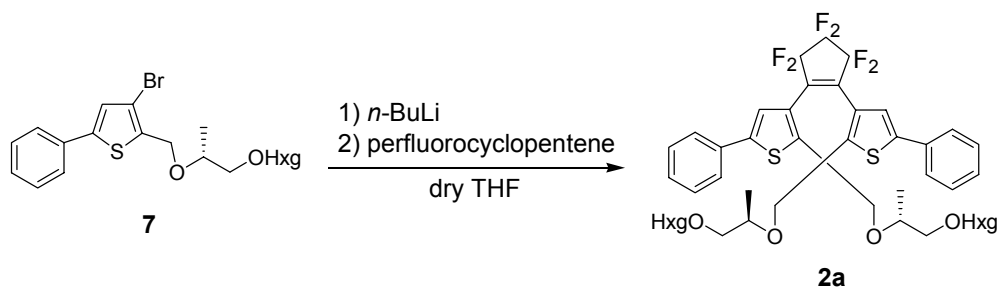

To a solution of compound **7** (90 mg, 0.149 mmol) in dry THF (0.5 mL) was slowly added *n*-butyllithium hexane solution (1.6 M, 0.098 mL, 0.156 mmol) at  $-78$  °C. After the addition of a solution of perfluorocyclopentene (10  $\mu\text{L}$ , 0.074 mmol) in dry THF (1 mL), the reaction mixture was further stirred for 1 h at that temperature. The reaction was quenched by the addition of water. The reaction product was extracted with ether ( $\times 3$ ), and the organic layer was washed with brine ( $\times 2$ ), dried over  $\text{MgSO}_4$ , filtrated, and evaporated. The crude product was purified by silica gel column chromatography (ethyl acetate  $\sim$  ethyl acetate:acetone = 1:1) to yield **2** (22 mg, 0.018 mmol, 24.3%) as a blue oil.

$^1\text{H NMR}$  ( $\text{CDCl}_3$ , TMS, 400 MHz)  $\delta$  1.04 (d,  $J = 6$  Hz, 6 H), 3.39 (s, 6 H), 3.35-3.69 (m, 54 H), 4.02-4.15 (m, 4 H), 7.31-7.37 (m, 4 H), 7.38-7.45 (m, 4 H), 7.57-7.63 (m, 4 H); MALDI-TOF MS ( $m/z$ ) calcd for  $\text{C}_{59}\text{H}_{82}\text{F}_6\text{O}_{16}\text{S}_2\text{Na}$ , 1247.48  $[\text{M} + \text{Na}]^+$ ; found 1247.29  $[\text{M} + \text{Na}]^+$ ; UV-vis ( $\text{H}_2\text{O}$ )  $\lambda_{\text{max}}$  295 nm; (AcOEt)  $\lambda_{\text{max}}$  283 nm.

Coresponding closed-ring isomer: UV-vis ( $\text{H}_2\text{O}$ )  $\lambda_{\text{max}}$  604 nm; (AcOEt)  $\lambda_{\text{max}}$  585 nm.

## B. Photochemical Measurement.

Absorption spectra were measured on a spectrophotometer (Hitachi U-3500). CD spectra were recorded on a JASCO J-720S spectrophotometer. Photoirradiation was carried out using a USHIO 500 W super high-pressure mercury lamp or a USHIO 500 W xenon lamp. Mercury lines of 313 nm and 578 nm were isolated by passing the light through a combination of band-pass filter (UV-D33S) or sharp-cut filter (Y-48) and monochromator (Ritsu MC-20L). Each diastereomer was separated by chiral HPLC (DAICEL co., CHIRALPAC AD-H ( $0.46\phi \times 25$  cm, 5  $\mu\text{m}$ ), hexane:2-propanol:ethanol = 10:65:25, Flow = 0.25 mL/min for compound **2**.

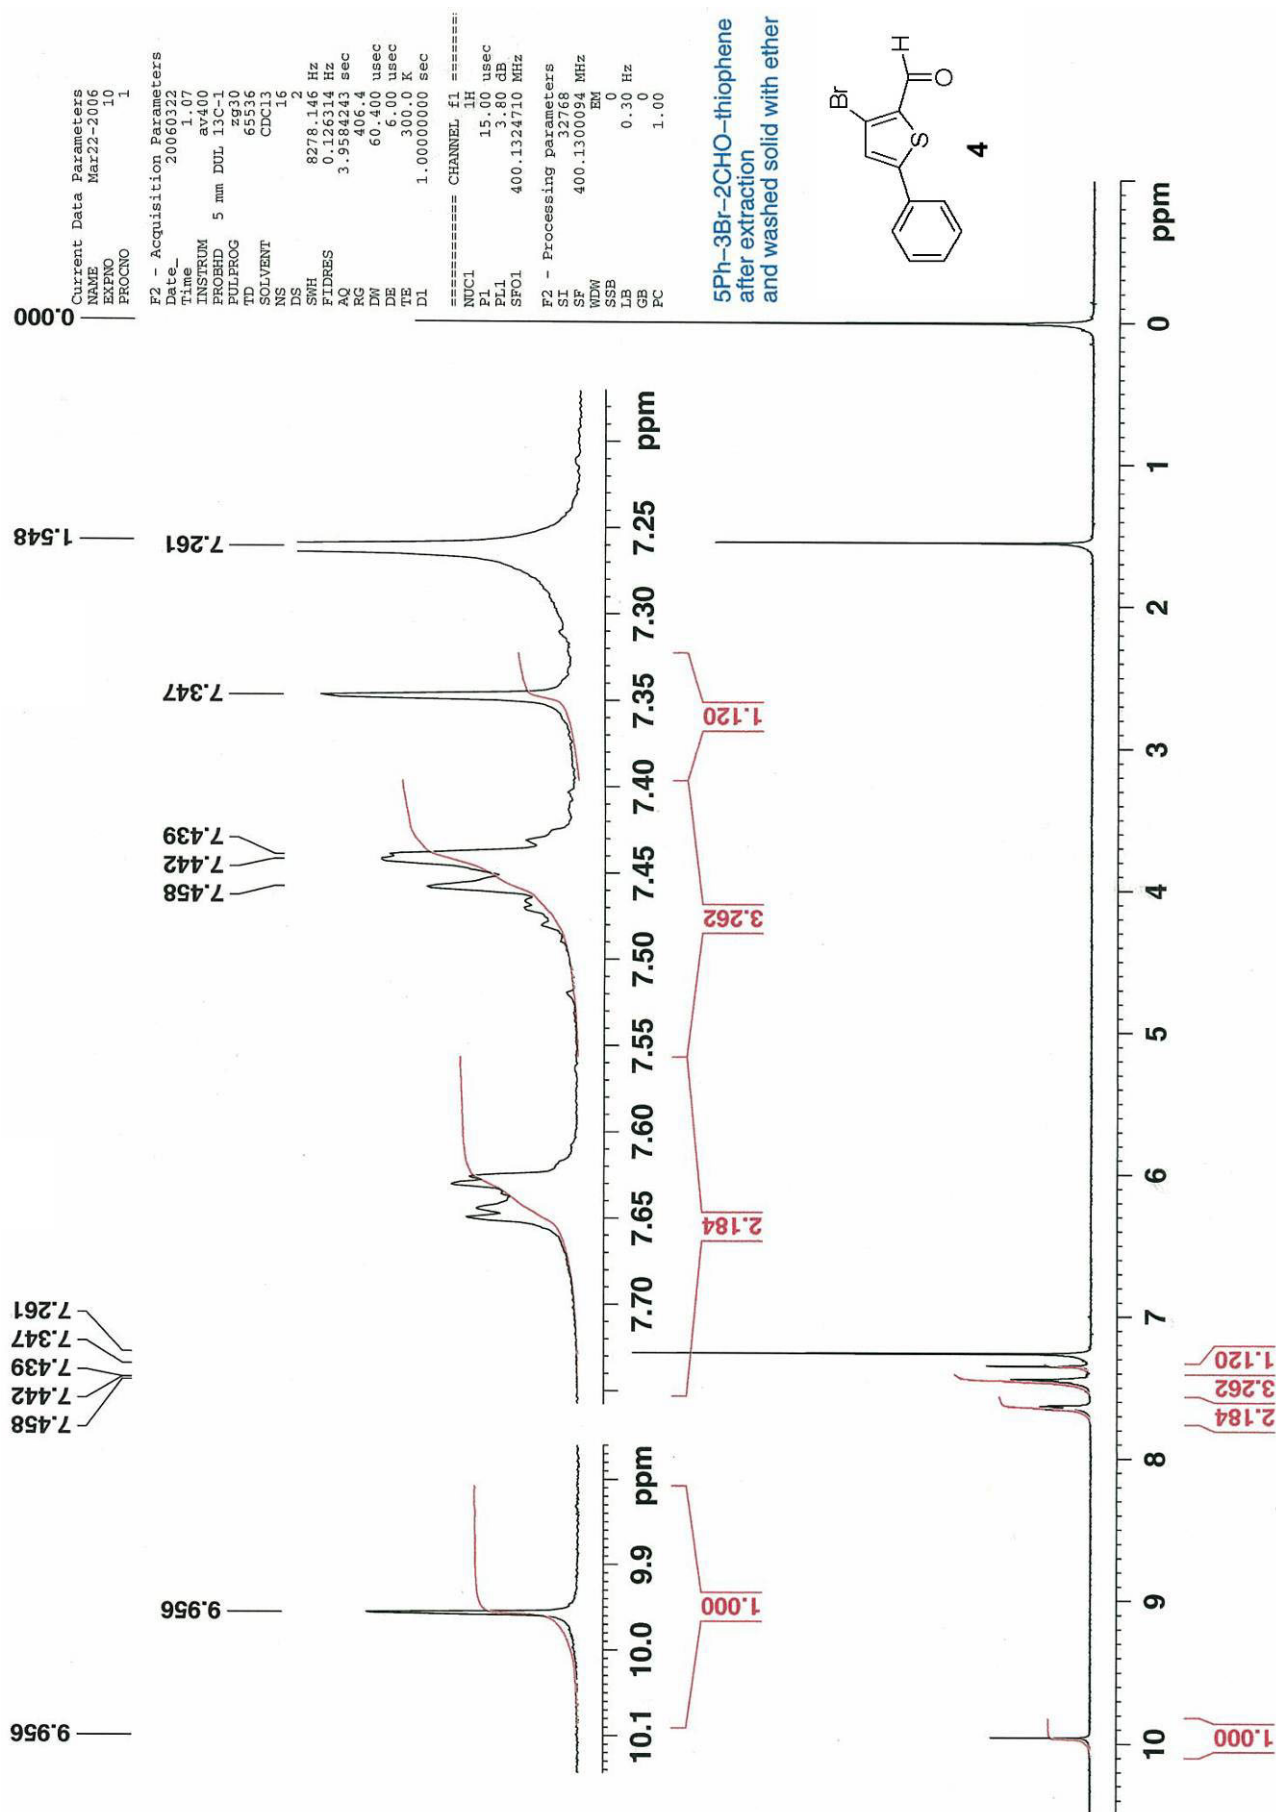

Figure S1. NMR spectrum of 4.

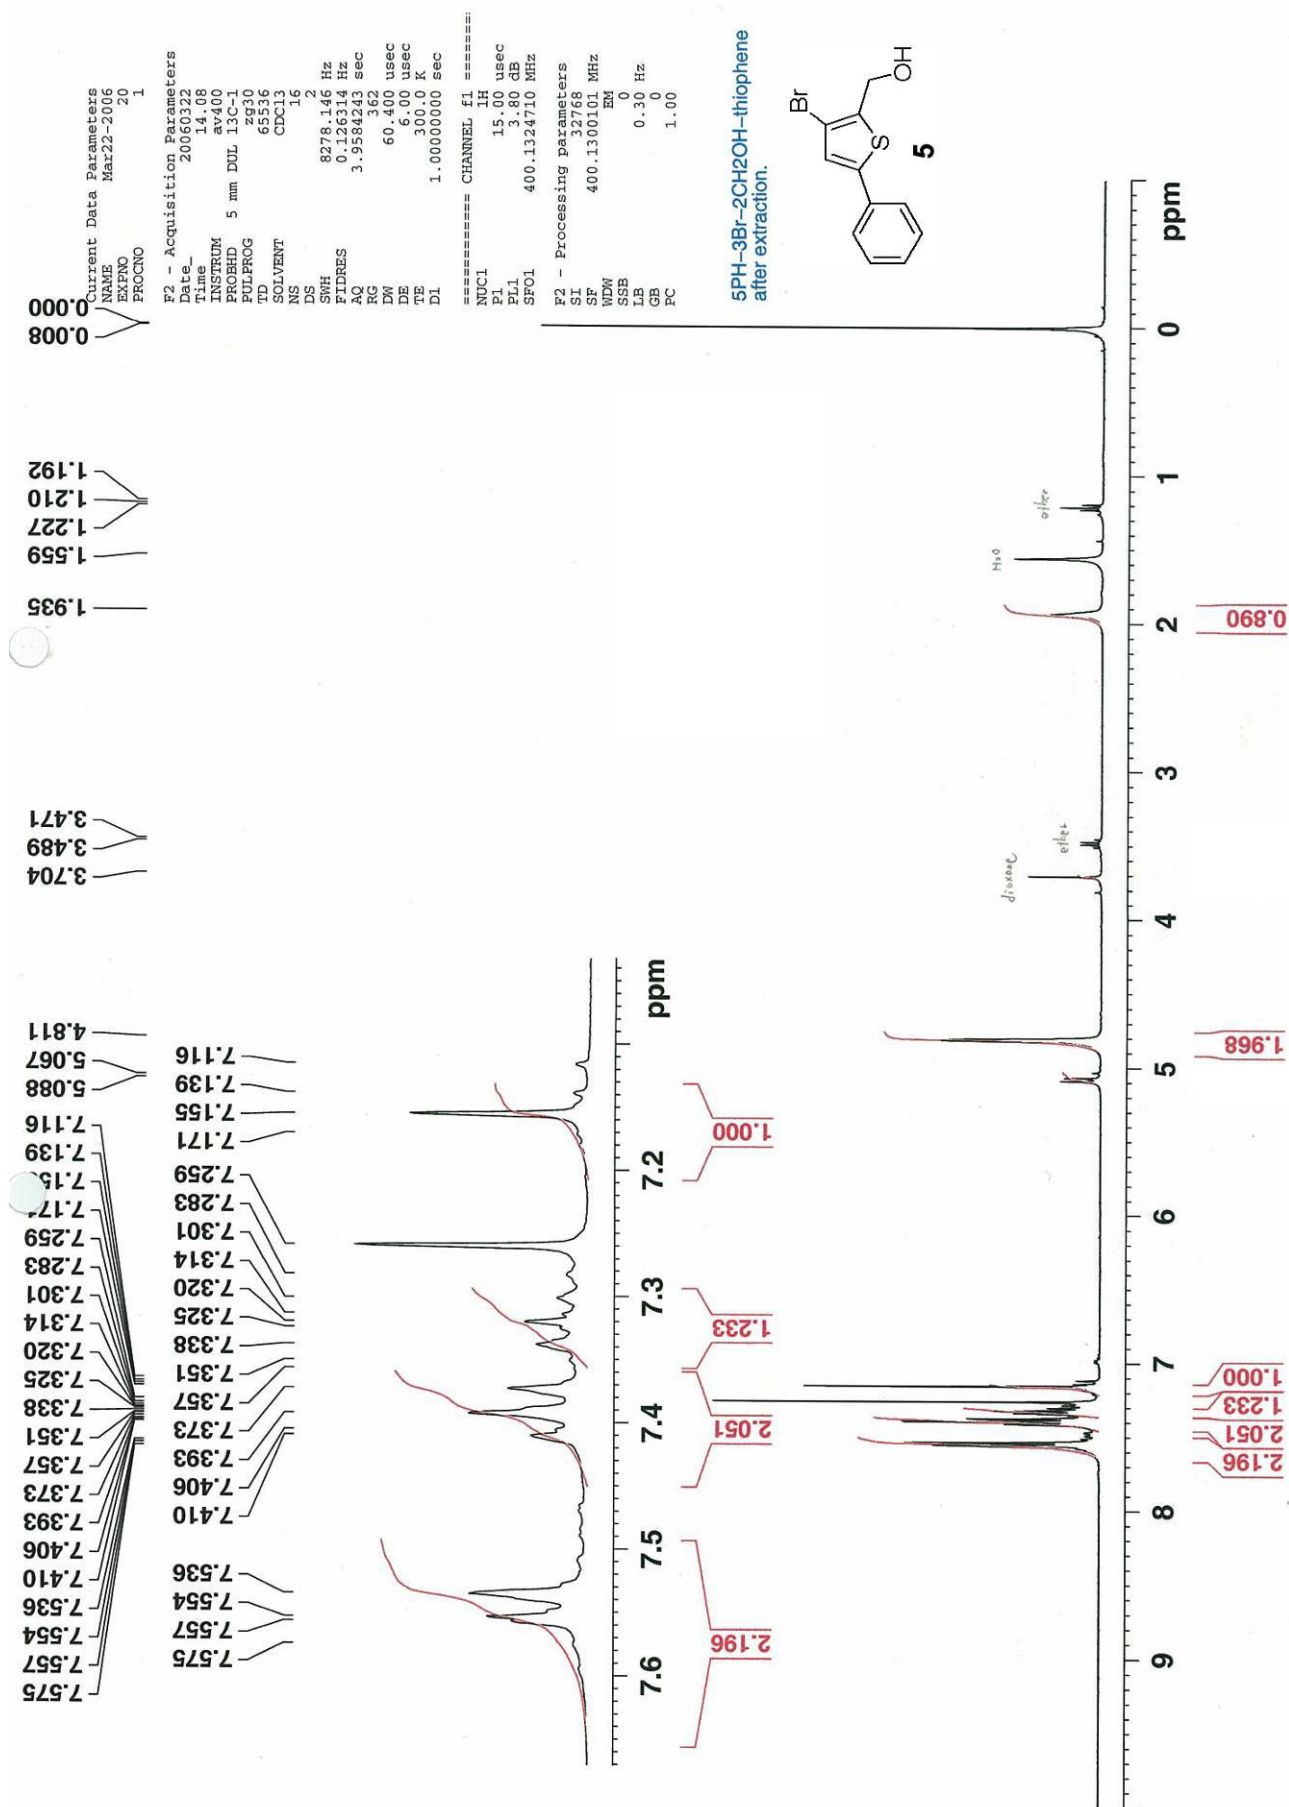

Figure S2. NMR spectrum of 5.





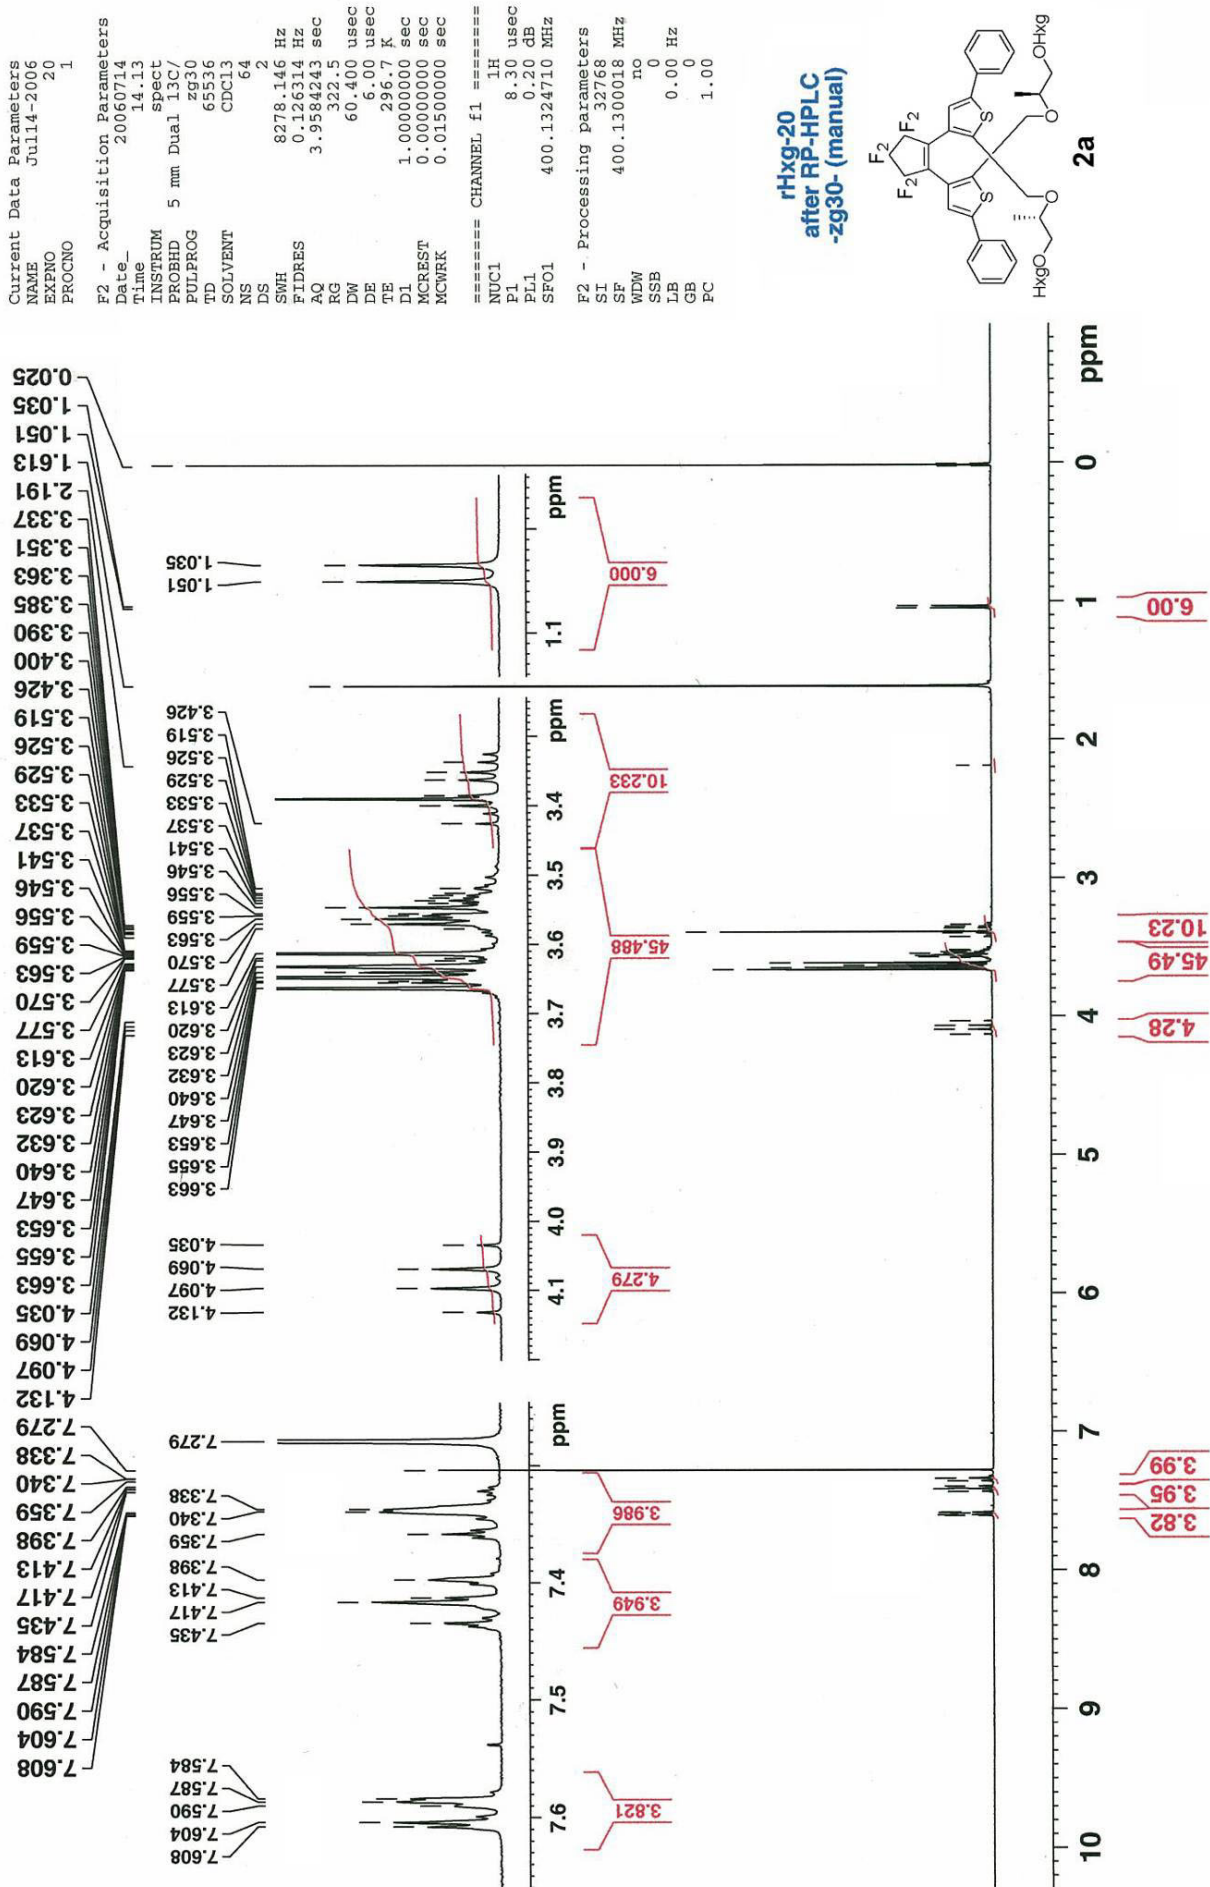

Figure S4. NMR spectrum of **2a**.



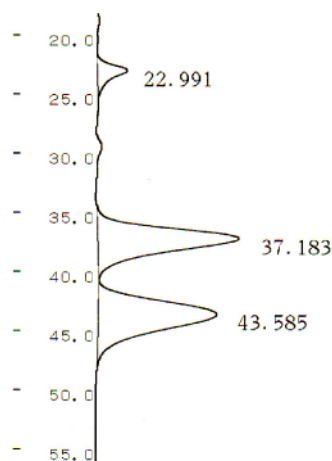

| CH    | PKNO | TIME   | AREA    | HEIGHT | MK | IDNO | CONC    |
|-------|------|--------|---------|--------|----|------|---------|
| 1     | 1    | 4.459  | 2875    | 176    |    |      | 0.1796  |
|       | 2    | 7.58   | 10410   | 260    |    |      | 0.6504  |
|       | 4    | 22.991 | 94675   | 1171   | S  |      | 5.9155  |
|       | 6    | 37.183 | 719691  | 5477   |    |      | 44.9675 |
|       | 7    | 43.585 | 772820  | 4605   |    |      | 48.287  |
| TOTAL |      |        | 1600471 | 11689  |    |      | 100     |

**Figure S5.** HPLC chart of **2** measured after irradiation with 313 nm light in ethyl acetate.  $d_e = 3.6\%$ . The peak with a retention time of ca. 23 min is the open-ring isomer. The peaks with retention times of ca. 37 min and ca. 43 min. are the two closed-ring isomer.

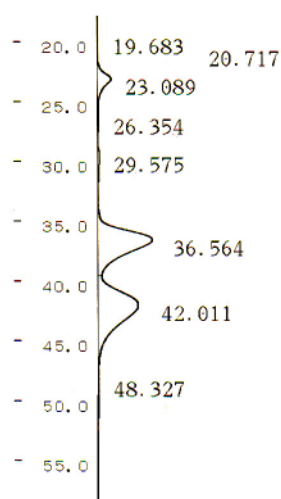

| CH    | PKNO | TIME   | AREA     | HEIGHT | MK | IDNO | CONC    |
|-------|------|--------|----------|--------|----|------|---------|
| 1     | 2    | 8.9    | 56331    | 770    |    |      | 0.2685  |
|       | 3    | 9.683  | 19080    | 662    | V  |      | 0.0909  |
|       | 4    | 10.128 | 15292    | 488    | V  |      | 0.0729  |
|       | 5    | 12.196 | 68058    | 1284   |    |      | 0.3244  |
|       | 6    | 19.683 | 21659    | 437    |    |      | 0.1032  |
|       | 7    | 20.717 | 59861    | 795    | V  |      | 0.2853  |
|       | 8    | 23.089 | 1484213  | 16882  | V  |      | 7.0745  |
|       | 9    | 26.354 | 137133   | 1186   | V  |      | 0.6536  |
|       | 10   | 29.575 | 325931   | 2922   | V  |      | 1.5536  |
|       | 11   | 36.564 | 9096369  | 67007  |    |      | 43.358  |
|       | 12   | 42.011 | 9667584  | 49971  | SV |      | 46.0807 |
|       | 13   | 48.327 | 28185    | 267    | T  |      | 0.1343  |
| TOTAL |      |        | 20979696 | 142670 |    |      | 100     |

**Figure S6.** HPLC chart of **2** measured after irradiation with 313 nm light in water at 25 °C (turbid solution).  $d_e = 3.0\%$ .

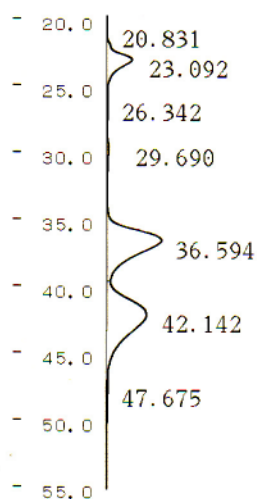

| CH    | PKNO | TIME   | AREA     | HEIGHT | MK | IDNO | CONC    |
|-------|------|--------|----------|--------|----|------|---------|
| 1     | 11   | 8.35   | 61234    | 762    |    |      | 0.311   |
|       | 12   | 10.09  | 27516    | 1006   | V  |      | 0.1397  |
|       | 13   | 10.644 | 34407    | 1150   | V  |      | 0.1747  |
|       | 14   | 10.92  | 25153    | 1066   | V  |      | 0.1277  |
|       | 15   | 11.548 | 44825    | 787    | V  |      | 0.2276  |
|       | 16   | 12.772 | 6117     | 232    | V  |      | 0.0311  |
|       | 17   | 14.59  | 8068     | 149    | S  |      | 0.041   |
|       | 19   | 16.825 | 21660    | 390    |    |      | 0.11    |
|       | 20   | 17.45  | 11263    | 313    | V  |      | 0.0572  |
|       | 21   | 20.831 | 124658   | 1172   | V  |      | 0.633   |
|       | 22   | 23.092 | 2351828  | 27974  | V  |      | 11.9429 |
|       | 23   | 26.342 | 163552   | 1366   | V  |      | 0.8305  |
|       | 24   | 29.69  | 296790   | 2495   | V  |      | 1.5071  |
|       | 25   | 36.594 | 8080050  | 60074  |    |      | 41.0315 |
|       | 26   | 42.142 | 8408927  | 43825  | SV |      | 42.7015 |
|       | 27   | 47.675 | 26281    | 290    | T  |      | 0.1335  |
| TOTAL |      |        | 19692326 | 143052 |    |      | 100     |

**Figure S7.** HPLC chart of **2** measured after irradiation with 313 nm light in water at 15 °C (clear solution).  $d_e = 2.6\%$

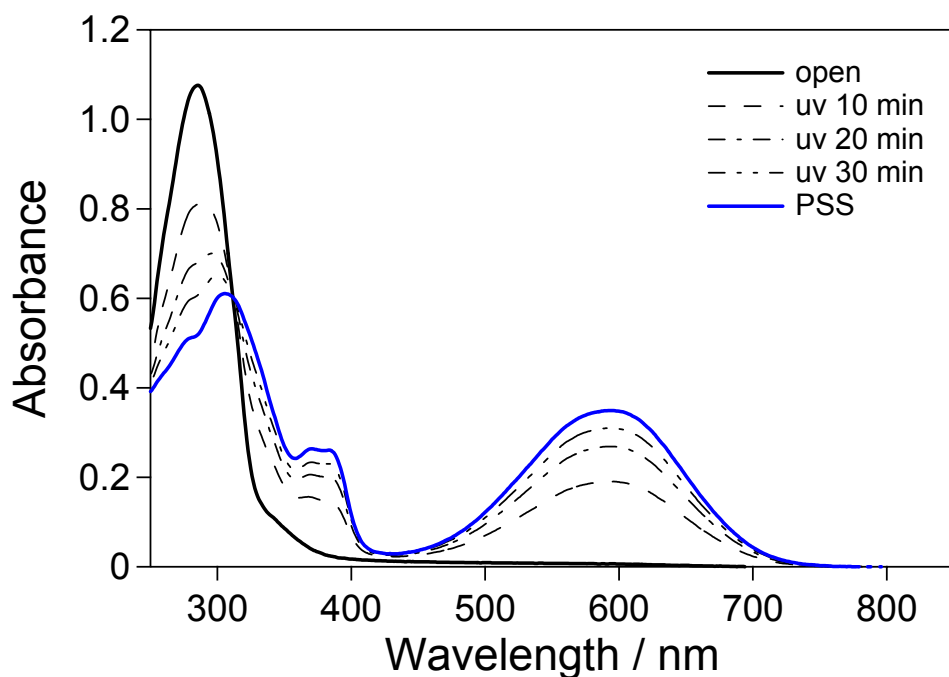

**Figure S8.** Photochromic spectral change of **2** measured below LCST in water under irradiation with 313 nm light. Irradiation and measurement were performed at 15 °C.

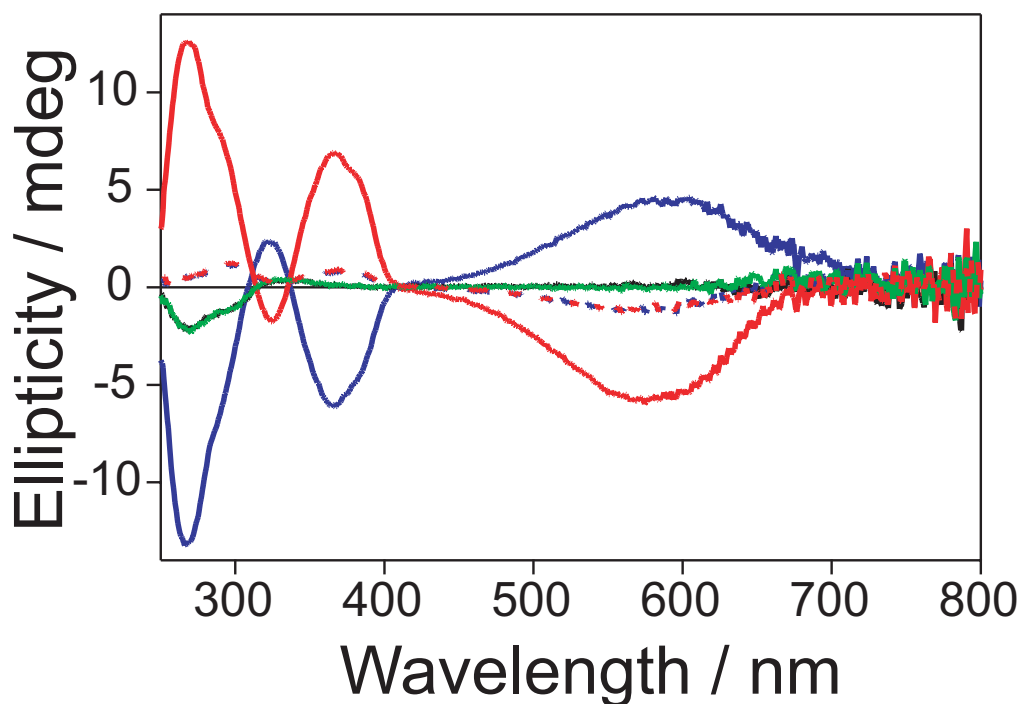

**Figure S9.** CD spectra of the separated two diastereomers in ethyl acetate. Blue and red solid lines denote the two different isomers. Black and green lines are the corresponding open-ring isomers measured after irradiation with visible light. Blue and red dashed lines are the sample in the photostationary state measured after successive irradiation with 313 nm light.

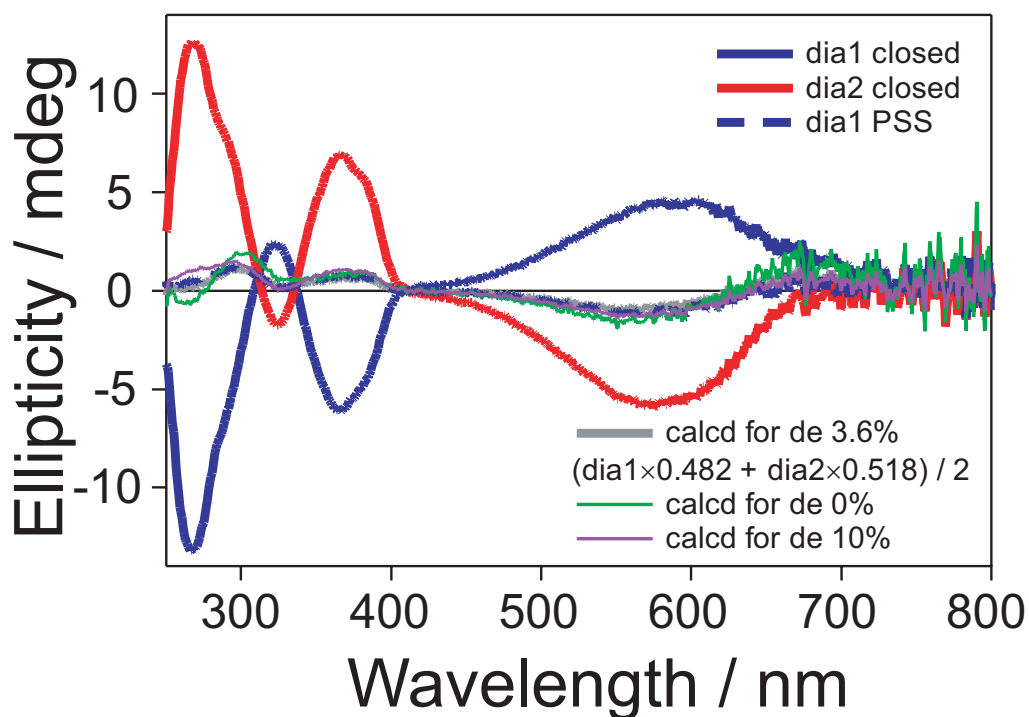

**Figure S10.** Calculated CD spectra of the closed-ring isomer **2a** with the observed spectra. Red and blue solid line denotes the separated two different diastereomers. Blue dotted lines are the sample in the photostationary state measured after successive irradiation with 313 nm light. Gray line denotes the calculated spectrum with de of 3.6%; green line, 0%; purple line, 10%.

## References

1. T. Kodani, K. Matsuda, T. Yamada, S. Kobatake and M. Irie, *J. Am. Chem. Soc.*, 2000, **112**, 9637.
2. T. Hirose, K. Matsuda and M. Irie, *J. Org. Chem.*, 2006, **71**, 7499.
